# Supplementary material
Source: publisher figshare collection journal article supplement (https://acs.figshare.com/ndownloader/files/14640827)
Supplement: Supplementary file 1 [file 14640827]

# Supporting Information

## Wide-field spectral super-resolution mapping of optically active defects in hBN

*Jean Comtet<sup>1,\*</sup>, Evgenii Glushkov<sup>1</sup>, Vytautas Navikas<sup>1</sup>, Jiandong Feng<sup>2,\*</sup>, Vitaliy Babenko<sup>3</sup>, Stephan Hofmann<sup>3</sup>, Kenji Watanabe<sup>4</sup>, Takashi Taniguchi<sup>4</sup>, Aleksandra Radenovic<sup>1,\*</sup>*

<sup>1</sup>Laboratory of Nanoscale Biology, Institute of Bioengineering, School of Engineering, École Polytechnique Fédérale de Lausanne (EPFL), 1015 Lausanne, Switzerland

<sup>2</sup> Zhejiang University, Tianmushan Road 148, Xixi Campus, Xi-6, 201, Hangzhou, 310027, China

<sup>3</sup>Department of Engineering, University of Cambridge, JJ Thomson Avenue, CB3 0FA Cambridge, United Kingdom

<sup>4</sup>National Institute for Materials Science, 1-1 Namiki, Tsukuba 306-0044, Japan

[\\*jean.comtet@gmail.com](mailto:jean.comtet@gmail.com), [jiandong.feng@zju.edu.cn](mailto:jiandong.feng@zju.edu.cn), [aleksandra.radenovic@epfl.ch](mailto:aleksandra.radenovic@epfl.ch)

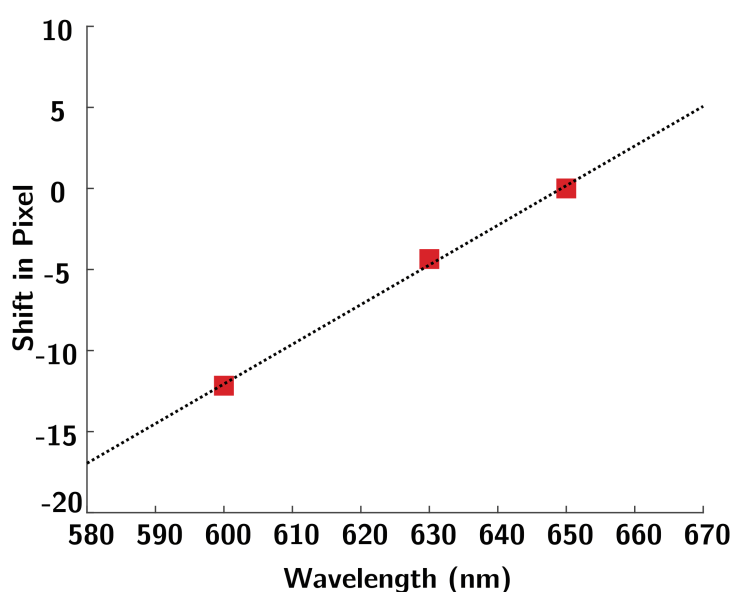

**Figure S1: Calibration of spectral SMLM.**

Linear calibration for the vertical shift in the spectral channel as a function of emission wavelength.

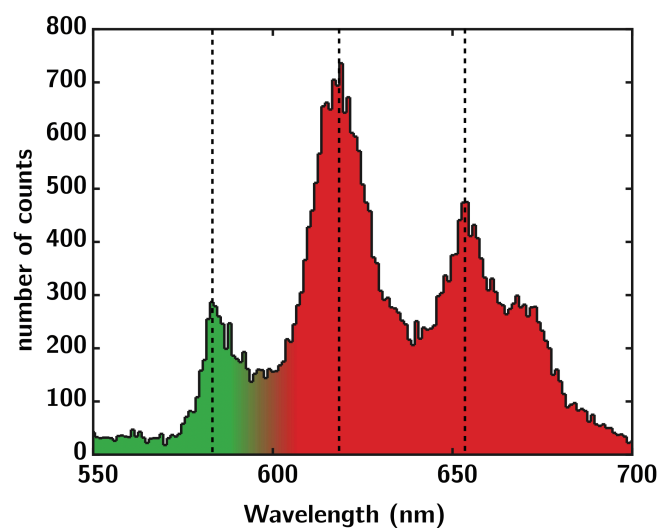

**Figure S2: Distribution of center emission wavelength for a CVD-grown flake, characterized by a trimodal distribution (Fig. 2c, Flake 4).**

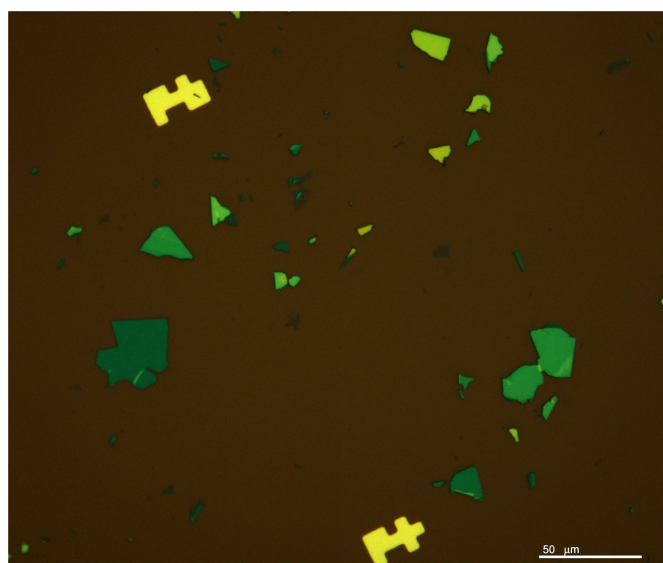

**Figure S3: Wide field image of exfoliated hBN crystals transferred on Si/SiO<sub>2</sub> chip.**

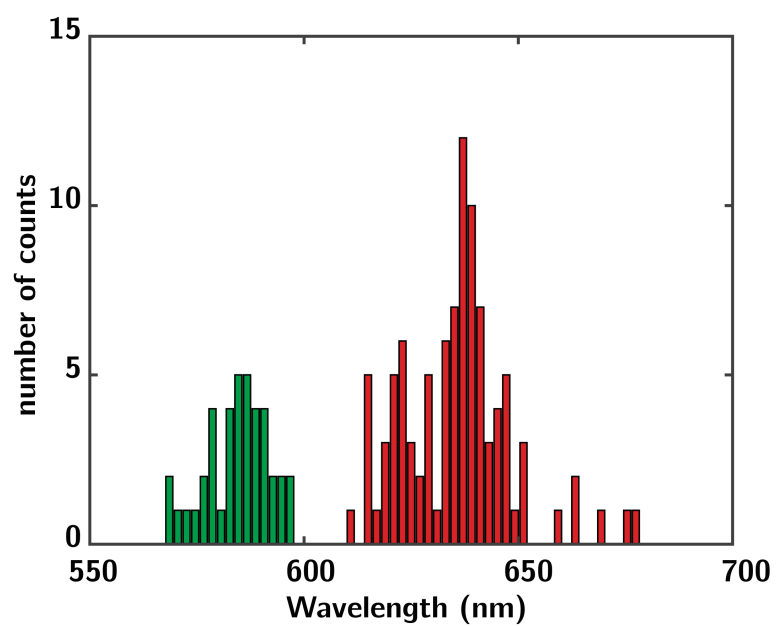

**Figure S4: Distribution of emission wavelength in various just-exfoliated hBN flakes. Bin size is 2 nm.**

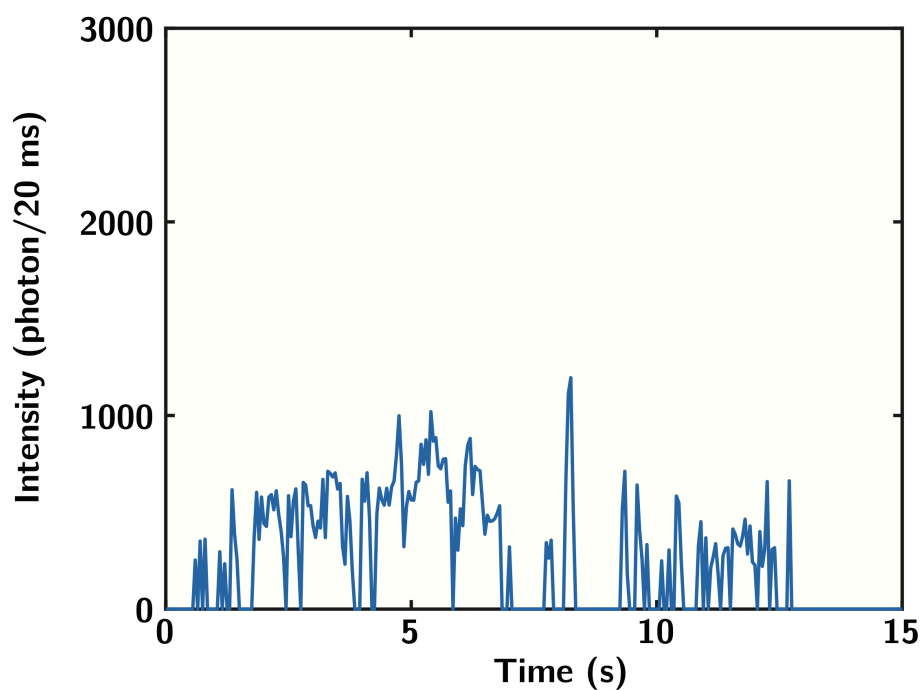

**Figure S5: Representative time trace for an emitter at the surface of an irradiated exfoliated flake.**

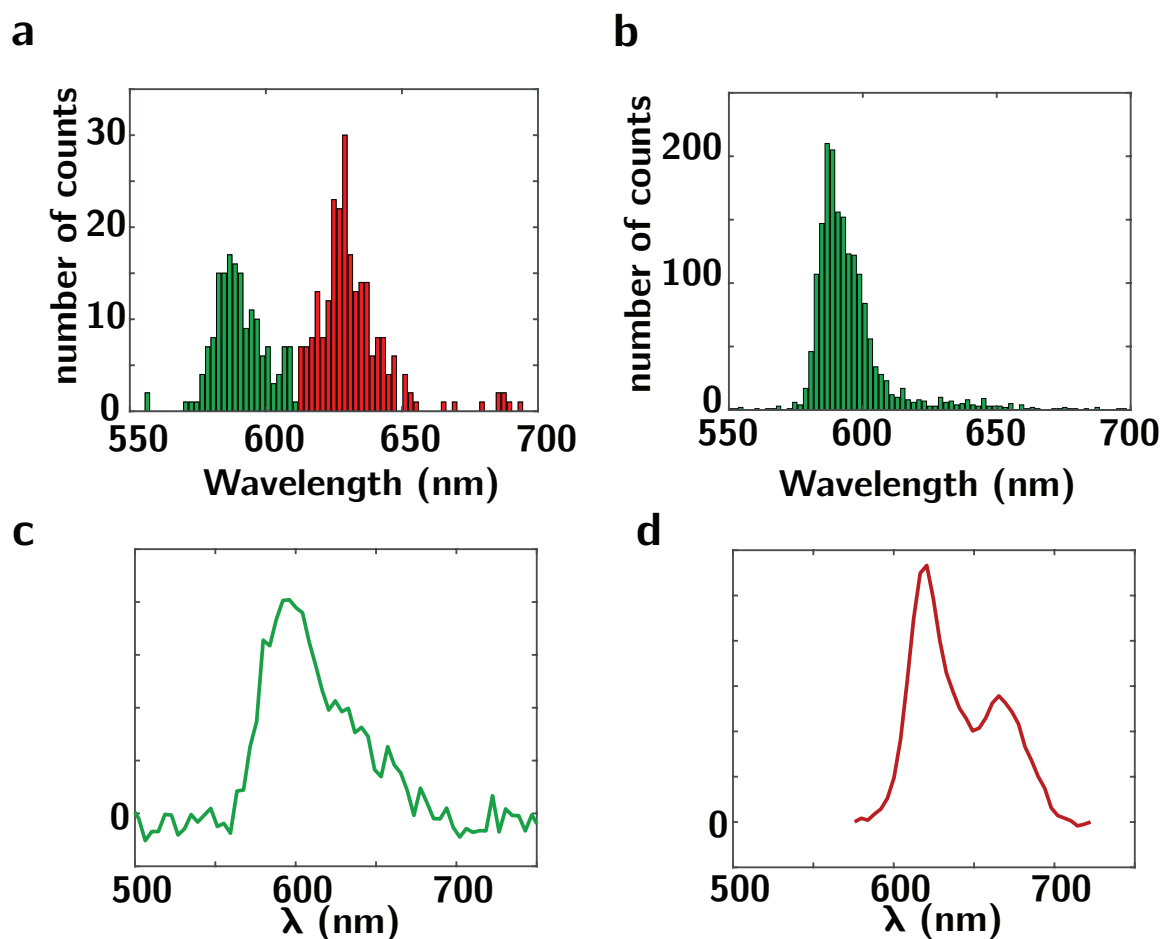

**Figure S6: Emitters in plasma-treated exfoliated hBN.** Distribution of emission wavelength in a plasma-treated exfoliated flake **(a)** showing dual emission wavelength distribution (corresponding to sample 2 in Fig. 4) and **(b)** showing single mode in emission wavelength, with few emitters with emission above 610 nm (corresponding to sample 8 in Fig. 4). Bin size is 2 nm. **(c-d)** Representative spectra of emitters for each population of emission wavelength, corresponding to type A **(c)** and type B **(d)** of Fig. 3 of main text.

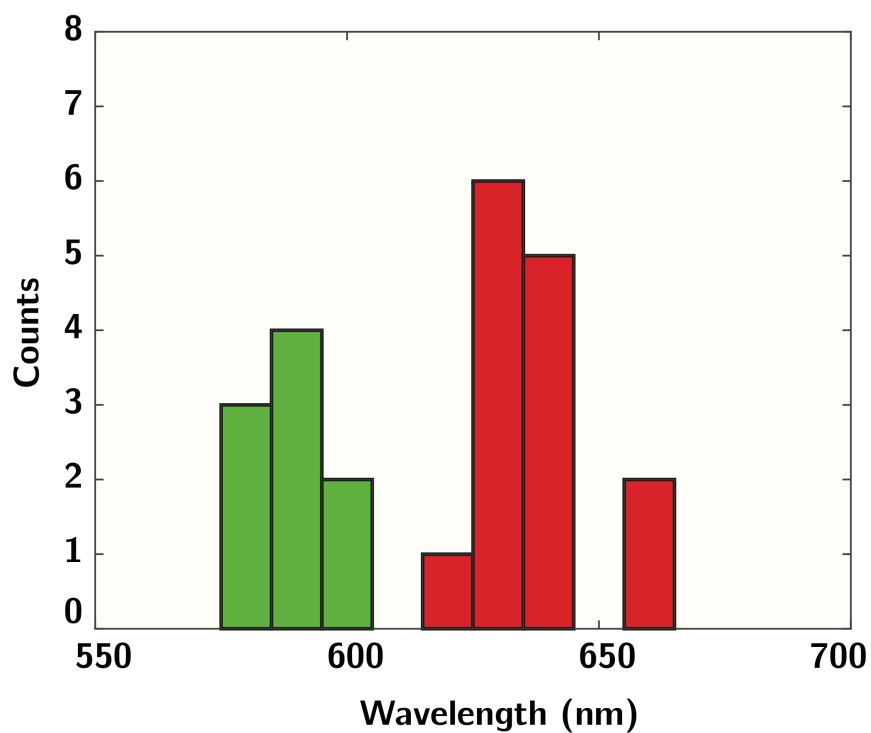

**Figure S7: Distribution of emission wavelengths for defects attributed as “type A” and “type B” in Fig. 5c-d. Bin size is 10 nm.**

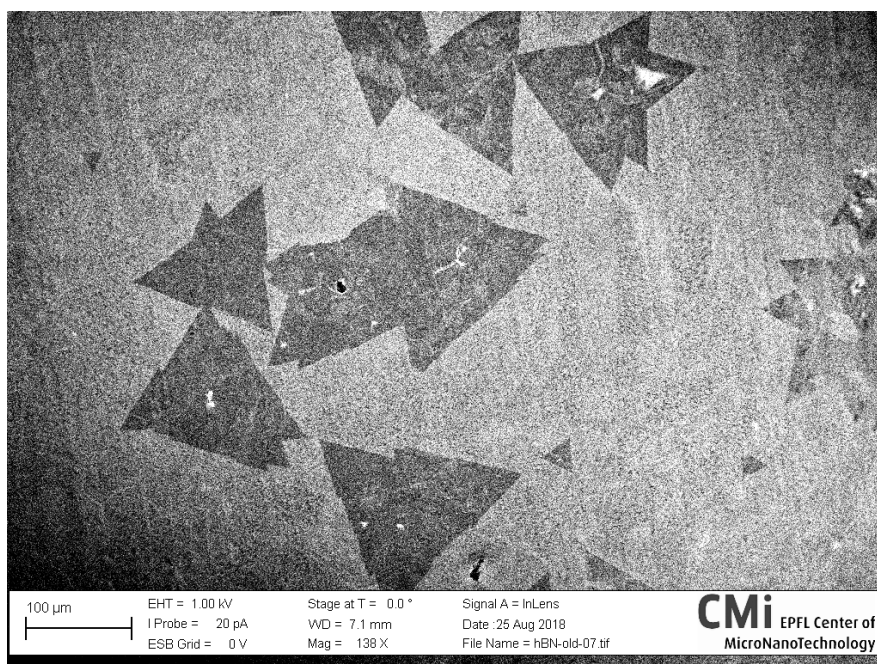

**Figure S8: SEM images of hBN flakes grown on Fe Foil.**
